# Supplementary material
Source: PubMed Central journal article supplement (PMC7086702)
Supplement: 705_2011_1110_MOESM1_ESM.pdf [file 705_2011_1110_MOESM1_ESM.pdf]

## Prosite motif search results for GBNV N protein phosphorylation:

### *Protein kinase C phosphorylation site :*

3 - 5: TvK

8 - 10: TeK

35 - 37: SfK

42 - 44: TnK

69 - 71: SgK

92 - 94: TfK

235 - 237: SlK

263 - 265: SkK

267 - 269: SsK

### *Casein kinase II phosphorylation site :*

82 - 85: TntD

106 - 109: SmvE

111 - 114: SknD

189 - 192: StyE

204 - 207: Sq1E

255 - 258: SmdD

### *Tyrosine kinase phosphorylation site :*

237 - 245: KkydEqvkY

### *cAMP- and cGMP-dependent protein kinase phosphorylation site :*

264 - 267: KKkS

265 - 268: KKsS
