# Supplementary material
Source: PubMed Central journal article supplement (PMC7086702)
Supplement: 705_2011_1110_MOESM3_ESM.pdf [file 705_2011_1110_MOESM3_ESM.pdf]

# Effect of RNase A on nucleic acid extracted from GBNV N protein

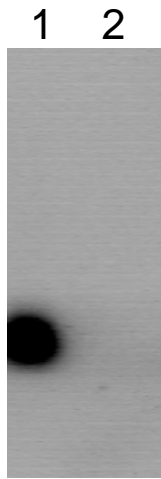

**Lanes:**

- 1 Nucleic acid without RNase A treatment**
- 2 Nucleic acid treated with RNase A (5  $\mu$ g / ml)**
